RESEARCH ARTICLE

# Hepatitis C distribution across diverse population groups in the Eastern Mediterranean Region: An umbrella review

Zahra Abdolahinia<sup>1,2</sup>, Sana Eybpoosh<sup>3☯\*</sup>, Parya Jangipour Afshar<sup>4</sup>, Ali Karamoozian<sup>5</sup>, Kayhan Azadmanesh<sup>6</sup>, Hamid Sharifi<sup>1,7☯\*</sup>

**1** HIV/STI Surveillance Research Center, and WHO Collaborating Center for HIV Surveillance, Institute for Futures Studies in Health, Kerman University of Medical Sciences, Kerman, Iran, **2** Department of Biostatistics and Epidemiology, Faculty of Public Health, Kerman University of Medical Sciences, Kerman, Iran, **3** Department of Epidemiology and Biostatistics, Research Centre for Emerging and Reemerging Infectious Diseases, Pasteur Institute of Iran, Tehran, Iran, **4** Health Services Management Research Center, Institute for Futures Studies in Health, Kerman University of Medical Sciences, Kerman, Iran, **5** Modeling in Health Research Center, Institute for Futures Studies in Health, Kerman University of Medical Sciences, Kerman, Iran, **6** Department of Molecular Virology, Pasteur Institute of Iran, Tehran, Iran, **7** Institute for Global Health Sciences, University of California, San Francisco, San Francisco, California, United States of America

☯ These authors contributed equally to this work.

\* [sharifihami@gmail.com](mailto:sharifihami@gmail.com) (HS); [sana.eybpoosh@gmail.com](mailto:sana.eybpoosh@gmail.com) (SE)

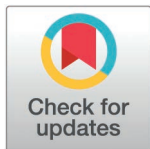

**OPEN ACCESS**

**Citation:** Abdolahinia Z, Eybpoosh S, Jangipour Afshar P, Karamoozian A, Azadmanesh K, Sharifi H (2026) Hepatitis C distribution across diverse population groups in the Eastern Mediterranean Region: An umbrella review. *PLoS One* 21(4): e0346782. <https://doi.org/10.1371/journal.pone.0346782>

**Editor:** Ashraf Elbahrawy, Al-Azhar University, EGYPT

**Received:** January 6, 2026

**Accepted:** March 24, 2026

**Published:** April 21, 2026

**Peer Review History:** PLOS recognizes the benefits of transparency in the peer review process; therefore, we enable the publication of all of the content of peer review and author responses alongside final, published articles. The editorial history of this article is available here: <https://doi.org/10.1371/journal.pone.0346782>

**Copyright:** © 2026 Abdolahinia et al. This is an open access article distributed under the terms of the [Creative Commons Attribution License](https://creativecommons.org/licenses/by/4.0/), which permits unrestricted use, distribution,

## Abstract

### Background

Hepatitis C virus (HCV) remains a major public health challenge in the Eastern Mediterranean Region (EMR), with prevalence varying across population groups. This umbrella review summarizes the distribution of HCV infection across diverse populations in the region.

### Methods

We conducted an umbrella review of systematic reviews with meta-analyses reporting HCV prevalence in the EMR. PubMed, Web of Science, Scopus, Iranian databases, including Magiran and the Scientific Information Database (SID), were searched. Google Scholar was additionally screened to ensure comprehensive coverage. Pooled estimates were extracted across four population groups: apparently healthy individuals; those with clinical or healthcare-associated exposure risk; patients co-infected with hepatitis viruses or other liver-related diseases; and key populations at increased risk (groups disproportionately affected due to their behaviors and higher vulnerability). For time-period analyses, meta-analyses were grouped into two intervals (before 2015 vs. 2015 and after) based on the median year of data collection of primary studies. Pooled prevalence was calculated using a random-effects model in STATA version 17.

and reproduction in any medium, provided the original author and source are credited.

**Data availability statement:** All relevant data are within the paper and its [Supporting information](#) files. The data were extracted from previously published studies, which are fully cited in the References. No new data were generated or collected in the course of this study.

**Funding:** This study was supported by the Iran National Science Foundation (INSF) and Kerman University of Medical Sciences (KMU) through a grant awarded to HSH (INSF Grant No. 4042461; KMU Grant No. 403000463). Additional support came from KMU in the form of salaries for ZA, PJA, AK, and HSH; the Pasteur Institute of Iran provided salaries for SE and KA. The specific roles of this author are articulated in the 'author contributions' section. The funders had no role in study design, data collection and analysis, decision to publish, or preparation of the manuscript.

**Competing interests:** The authors have declared that no competing interests exist.

## Results

A total of 55 meta-analyses were included. The pooled HCV prevalence was 31.0% (95% CI: 27.0–38.0) among key populations, and also 31.0% (95% CI: 12.0–49.0) among patients co-infected with other hepatitis viruses or liver-related diseases. Those with clinical or healthcare-associated exposure risk showed a prevalence of 28.0% (95% CI: 23.0–32.0), whereas the apparently healthy population had the lowest prevalence at 2.0% (95% CI: 1.0–2.0). Subgroup analysis indicated a decline in prevalence among clinically exposed populations after 2015, from 29% to 10%, coinciding with the direct-acting antivirals (DAAs) and strengthened infection-control practices. The highest prevalence was observed among key populations in Libya, healthcare-exposed populations in Morocco, and apparently healthy individuals in Egypt.

## Conclusion

Variation in HCV prevalence across populations in the EMR highlights the need for population-specific strategies to support progress toward World Health Organization elimination targets.

## Introduction

Hepatitis C virus (HCV) remains a significant global health burden, affecting a considerable number of people worldwide [1]. According to the World Health Organization (WHO) estimates, by 2024, approximately 50 million people will be living with chronic HCV infection globally, with about 1 million new infections occurring annually [2]. HCV infection is prevalent in all WHO regions, with the highest burden of disease in the Eastern Mediterranean Region (EMR), and 12 million chronically infected people. This is followed by South-East Asia and Europe, each with approximately 9 million cases, and the Western Pacific Region (7 million) [2]. The distribution of HCV genotypes varies across regions worldwide [3]. Genotypes 1, 2, and 3 are globally distributed, whereas genotypes 4 and 5 are found mainly in North Africa, and genotype 6 is predominantly distributed in Southeast Asia and southern China [3,4].

The epidemiological patterns of HCV in the EMR are highly diverse, with substantial variation in prevalence, risk factors, and circulating genotypes across countries [5,6]. As a blood-borne pathogen, HCV is primarily transmitted through exposure to infected blood, often due to unsafe medical injections, inadequate infection-control practices in healthcare settings, transfusion of unscreened blood, injection drug use, or sexual activities involving blood exposure [2]. The exceptionally high prevalence of HCV in Egypt has been largely attributed to historical mass treatment campaigns for schistosomiasis during the mid-20th century, in which reuse of injection equipment led to widespread iatrogenic transmission [7]. Although HCV infection has historically been a major indication for liver transplantation and reinfection after transplantation

was common, the epidemiological outlook has changed markedly following the introduction of highly effective direct-acting antivirals (DAAs) since 2013. These treatments have substantially reduced disease burden and mortality, lowering, though not eliminating the need for an effective vaccine [8]. Furthermore, HCV prevalence significantly differs across various populations, with higher rates observed among several populations such as people who inject drugs, hemodialysis patients, and people in prison [9–11].

Despite ongoing global and regional efforts, several contextual challenges continue to prevent HCV elimination in the EMR [12]. Although progress has been achieved in some countries, including improvements in governance and policy-making and expansion of HCV testing and treatment services, important gaps remain. Limited financial resources make it difficult to expand necessary interventions, including safe injection practices, harm reduction strategies, and broader access to diagnostic and therapeutic services. To accelerate progress toward elimination, these components need to be integrated into national plans for universal health coverage [12]. In line with this goal, the WHO introduced the global health strategy on viral hepatitis, defining elimination as a 90% reduction in incidence and a 65% reduction in hepatitis B and C–related mortality between 2015 and 2030 [13].

Several studies have examined HCV prevalence across EMR countries among diverse populations, including the general population, key populations, and individuals with clinical or healthcare-associated exposure risk [14,15]. However, available evidence remains fragmented, varies in scope and quality, and lacks systematic integration. To address this gap and identify both pooled prevalence estimates and the populations most affected, thereby informing future research and policies aimed at HCV elimination, this umbrella review provides a comprehensive overview of HCV prevalence across population groups in the EMR.

## Materials and methods

### Search strategy and study selection

The CoCoPop framework was used to identify keywords and guide the evaluation of articles retrieved from databases (S1 Table), incorporating the investigated Condition, Context, and Population relevant to this umbrella review of prevalence meta-analyses [16]. This umbrella review was reported in accordance with the PRISMA (Preferred Reporting Items for Systematic Reviews and Meta-Analyses) guidelines to ensure methodological transparency and completeness (Fig 1). In this paper, the term “reviews” refers to published systematic reviews that included meta-analyses and were eligible for inclusion. We also manually verified that no relevant primary studies had been omitted from the included meta-analyses. The term “primary studies” refers to original investigations reporting HCV prevalence in defined populations.

This study was conducted as part of a large project and was approved by the Ethics Committee of Kerman University of Medical Sciences, Kerman, Iran (Ethics Code: IR.KMU.REC.1403.319). We searched PubMed, Web of Science, Scopus, and Iranian databases, including Magiran and the Scientific Information Database (SID). Google Scholar was additionally screened to ensure comprehensive coverage. Searches included systematic reviews with meta-analyses reporting HCV prevalence in EMR countries published up to October 12, 2025, without language restrictions.

Meta-analyses reporting prevalence estimates with corresponding confidence intervals and providing sufficient data for their calculation were included. The literature search employed combinations of terms related to HCV and EMR countries, including alternative forms of country names, to ensure comprehensive coverage. Two authors (ZA and PJA) independently conducted the literature search. Reference lists of included reviews were also manually screened to identify additional relevant articles not captured in the initial search. The detailed search strategy is provided in the Supporting Information (S2 Table). Extracted information included author, publication year, number of included studies, number of events, sample size, HCV prevalence with 95% confidence intervals, and study population (S3 Table).

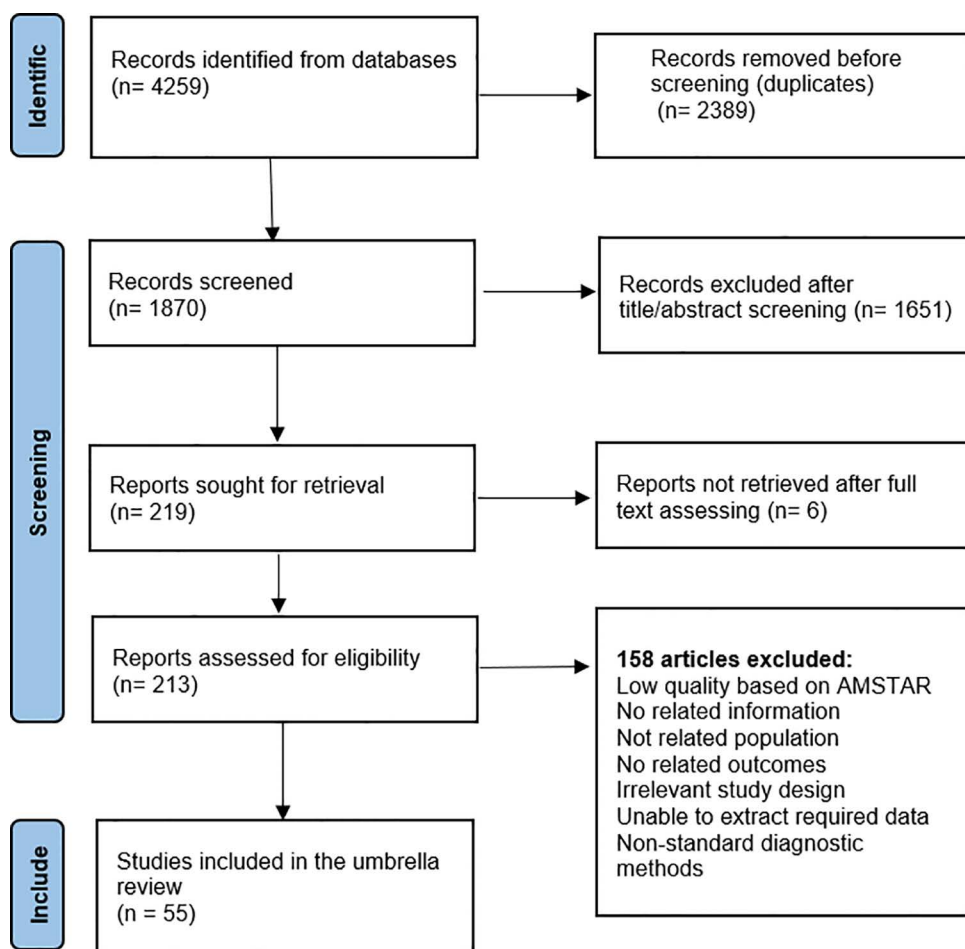

Fig 1. Flowchart PRISMA of review selection for inclusion in the umbrella review.

<https://doi.org/10.1371/journal.pone.0346782.g001>

### Population categories and overlap assessment

Meta-analyses were stratified into four population groups to account for differences in exposure, risk, and clinical context. The first group comprised key populations with high behavioral and social risk, including people who inject drugs (PWID), people who use drugs, men who have sex with men (MSM), female sex workers (FSW; women who receive money or goods in exchange for sexual services), people living with HIV (PLHIV; individuals diagnosed with HIV), and street children (children and adolescents who live and/or work on the streets with limited or no parental care) [17]. The second group included individuals with clinical or healthcare-associated exposure risk, such as patients undergoing hemodialysis, those with thalassemia, hemophilia, or other inherited coagulation disorders, multi-transfused patients, healthcare workers, household contacts of HCV-infected individuals, and patients with other comorbidities. The third group comprised patients with liver-related conditions or hepatitis B (HBV) co-infection. The fourth group consisted of apparently healthy individuals representing the general community, including participants in screening programs or household surveys, blood donors, pregnant women, children, refugees, and military recruits.

To minimize overlap among primary studies and facilitate more accurate country-level comparisons within the EMR, we included meta-analyses reporting pooled estimates at the country level. Overlap of primary studies across systematic reviews was assessed using citation matrices, where rows represented unique primary studies and columns represented

reviews. Cells indicated the presence [1] or absence (0) of each study in a given review. For each population category (key populations, co-infected patients, individuals with clinical or healthcare-associated exposure risk, and apparently healthy individuals), the corrected covered area (CCA) was calculated using the following formula:

$$CCA = \frac{N_r - N_s}{N_s(N_k - 1)} \times 100$$

Where  $N_r$  as the total number of study occurrences across reviews,  $N_s$  is the number of unique studies, and  $N_k$  as the number of reviews. Based on published recommendations, we interpreted CCA values  $\leq 5\%$  as slight, 6–10% as moderate, 11–15% as high, and  $>15\%$  as very high overlap [18].

Screening of all publications based on eligibility criteria was performed independently by two authors (ZA and PJA). In the first step, all titles and abstracts imported into EndNote were screened. In cases of disagreement between the two authors, a third reviewer was consulted to reach a final decision. A standardized data extraction form was created in an Excel spreadsheet to efficiently collect information from the included studies. The following data were extracted: first author, year of publication, population category, number of events and participants, number of studies included in the meta-analysis, prevalence of HCV, and 95% CI (S3 Table).

### Quality assessment

To assess the methodological quality of the included systematic reviews, two authors (ZA and PJA) independently evaluated the articles using the original AMSTAR tool (A Measurement Tool to Assess Systematic Reviews), which comprises 11 items assessing key aspects of review methodology, as described by Shea et al. [19]. Each item was rated as ‘Yes’, ‘No’, or ‘Not applicable’, yielding a total score ranging from 0 to 11. Scores of 8–11 were classified as high quality, 4–7 as moderate quality, and 0–3 as low quality. Any discrepancies between the reviewers were resolved through discussion. Studies with sufficient quality were selected for further investigation. The quality ratings for each study are provided in Supplementary information (S3 Table). Only studies with moderate or high quality (AMSTAR score  $\geq 4$ ) were included in subsequent analyses, whereas low-quality studies (AMSTAR score 0–3) were excluded. Excluding low-quality meta-analyses reduces potential bias and ensures that the findings of this umbrella review are based on more reliable evidence.

### Data synthesis

Random-effects models were used to estimate the pooled prevalence and corresponding 95% confidence intervals (CIs). Heterogeneity across studies was evaluated using the  $I^2$  statistic and Cochran’s Q test, with substantial heterogeneity defined as  $I^2 > 50\%$  or a Q test p-value  $< 0.10$ , in line with established recommendations for meta-analyses of observational studies (Higgins & Thompson, 2002; Huedo-Medina et al., 2006) [20]. P-values  $< 0.05$  were considered statistically significant. Detailed heterogeneity and pooled prevalence estimates are provided in Supplementary information (S3 Table). Publication bias was not assessed using formal tests or funnel plots because these are unreliable for meta-analyses of proportions due to the bounded nature and instability of variance in proportion data. Instead, publication bias was evaluated qualitatively, consistent with methodological recommendations for prevalence meta-analyses [21]. The random-effects model accounts for expected heterogeneity across countries with varying population sizes and prevents studies with very large sample sizes from disproportionately influencing the pooled estimate. All analyses were conducted using Stata version 17.0 (StataCorp, College Station, TX, USA).

### Time-period subgroup analysis

To explore temporal trends in HCV prevalence in the EMR, we conducted a subgroup analysis based on the median year of data collection of the primary studies included in each meta-analysis. Because umbrella reviews synthesize evidence from existing meta-analyses, the publication year of a meta-analysis does not necessarily reflect the time frame of the

underlying data. Using the median year of data collection provides a robust measure of the central temporal distribution while minimizing the influence of early or late outlier studies. For each meta-analysis, we extracted the year of data collection for all primary studies (or, if unavailable, the year of publication or last reported search date). The median year of the included primary studies was then calculated and used as the temporal indicator. Meta-analyses were classified into two time periods: before 2015 vs. 2015 and after, reflecting the expansion of direct-acting antiviral (DAA) treatments. Subgroup analyses compared pooled prevalence estimates across these periods to assess temporal changes in HCV epidemiology within the region.

## Results

A total of 4,259 records were identified through database searches. After removing 2,389 duplicates, 1,870 records remained for screening. Following the title and abstract assessment, 1,651 records were excluded, leaving 219 records for full-text retrieval. Six records could not be retrieved, and the full texts of the remaining 213 records were assessed for eligibility. Of these, 158 were excluded due to irrelevant content, resulting in 55 meta-analyses included in the study. When a study reported separate prevalence estimates for different countries or population categories, each estimate was treated as an individual observation. Consequently, although 55 studies were included, a total of 218 prevalence estimates were extracted and analyzed across EMR countries. These estimates were distributed across the following population groups: key populations (including PWID, people who use drugs, MSM, FSW, PLHIV, and street children) contributed 76 estimates (35.9%; references [22–48]); co-infected patients contributed 9 estimates (4.2%; references [43,49–52]); individuals with clinical or healthcare-associated exposure contributed 78 estimates (36.8%; references [23,26,43,44,49,51,53–73]); and apparently healthy individuals contributed 49 estimates (23.1%; references [6,25,26,28,40,43,44,49,54–57,64,66,68,72,74–85]). The Frequency of prevalence estimates by EMR countries is shown in Fig 2. Iran, Pakistan, and Egypt accounted for the majority of available estimates, respectively, which indicates a higher research focus or disease burden in these countries compared with others in the region.

The  $I^2$  values reported across included meta-analyses ranged from 23.4% to 100%, indicating varying levels of heterogeneity among the pooled estimates.

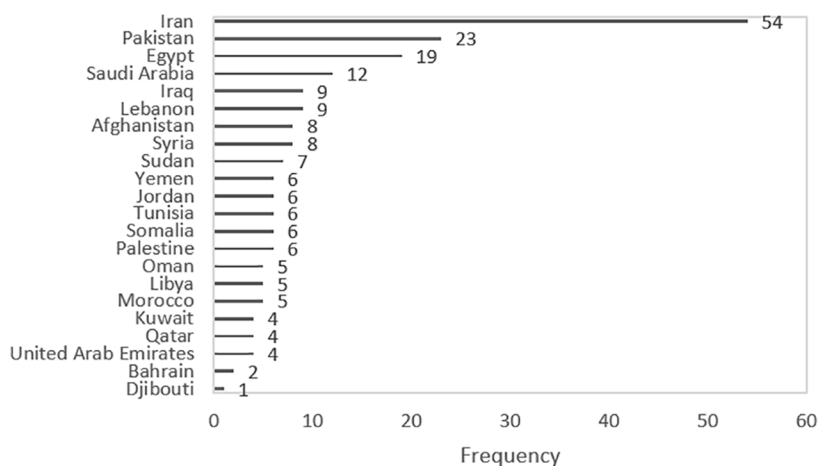

**Fig 2. Frequency of HCV prevalence estimates by countries in the Mediterranean region up to 2025.**

<https://doi.org/10.1371/journal.pone.0346782.g002>

## Overlap assessment

The extent of overlap between systematic reviews varied across population categories. The lowest overlap was observed among apparently healthy individuals, including the general population, screening samples, blood donors, pregnant women, children, refugees, household surveys, and army recruits, with a CCA of 4.8%. In key populations, the CCA reached 5.4%, indicating moderate overlap. Individuals with clinical or healthcare-associated exposure risk had a CCA of 7.4%, indicating moderate overlap. The highest overlap was observed among co-infected patients, with a CCA of 9.0%.

## HCV prevalence in EMR

A total of 19 studies (49 estimates), including 65,900,000 participants, assessed pooled HCV prevalence among apparently healthy individuals. The pooled prevalence in this group was 2.0% (95% CI: 1.0–2.0) (Fig 3). The pooled prevalence of HCV in 21 related studies (78 estimates) from people with clinical or healthcare-associated exposure risk, comprising 625,828 participants, was 28.0% (95% CI: 23.0–32.0) (Fig 4). In the co-infected patient group, five related studies (providing 9 estimates) included 155,980 participants, and the prevalence of HCV was 31.0% (95% CI: 12.0–49.0) (Fig 5). Finally, 25 studies (76 estimates) among key population groups, 22,200,000 participants were assessed, and the HCV prevalence in this group was 31.0% (95% CI: 27.0–38.0) (Fig 6). Prevalence estimates were tabulated by population category and country. Forest plots were used to visually display the pooled prevalence and 95% CI for each group (Figs 3–6).

HCV prevalence across EMRO countries varied markedly by population group. In apparently healthy individuals (Panel A), Egypt, Pakistan, and Yemen had the highest prevalence. Among populations with clinical or healthcare-associated exposures (Panel B), prevalence was highest in Morocco, Syria, and Saudi Arabia. In key populations (Panel C), Libya, Morocco, and Saudi Arabia ranked highest, respectively. These findings highlight substantial heterogeneity in HCV prevalence across EMR countries, driven by population-specific risk profiles (Fig 7).

## Time period

A temporal shift in HCV prevalence was observed among patients with clinical or healthcare-associated exposure risks, where HCV prevalence declined from 29% (95% CI: 24%–34%) before 2015 to 10% (95% CI: 7%–12%) in 2015 and thereafter. In contrast, no meaningful reduction was observed among key populations or apparently healthy individuals (S1–S6 Figs). Insufficient data were available for co-infected groups to assess the temporal shift.

## Discussion

This review provided evidence on the distribution of HCV across different population groups in the EMR. In the key population and also other hepatitis types and liver-related co-infected patients, the pooled prevalence was relatively higher than in other groups (31.0%). This estimate was lower among people with clinical or healthcare exposure risk (28.0%), and particularly among apparently healthy individuals (2.0%). Also, HCV prevalence varies among EMR countries. Egypt, Pakistan, and Yemen exhibited the highest prevalence of HCV in apparently healthy individuals. Among populations with clinical or healthcare-related exposures, prevalence was highest in Morocco, Syria, and Saudi Arabia. Within key populations, Libya, Morocco, and Saudi Arabia had the highest prevalence.

According to the WHO reports, settings with intermediate to high HCV prevalence are defined as those with an HCV antibody seroprevalence exceeding 2% in the general population [86]. Based on our findings, some EMR countries fall into this category, thereby classifying the region as having one of the highest prevalence rates worldwide. This categorization highlights the persistent burden of infection in the EMR compared to countries in the European Union/European Economic Area (EU/EEA), where the prevalence estimates among the apparently healthy individuals and general population are markedly lower [87]. It should be noted that European countries have taken blood screening and iatrogenic infection control (e.g., during dialysis or injections) seriously since the 1990s [88,89]. Such cases are likely to contribute to explaining the differences between regions.

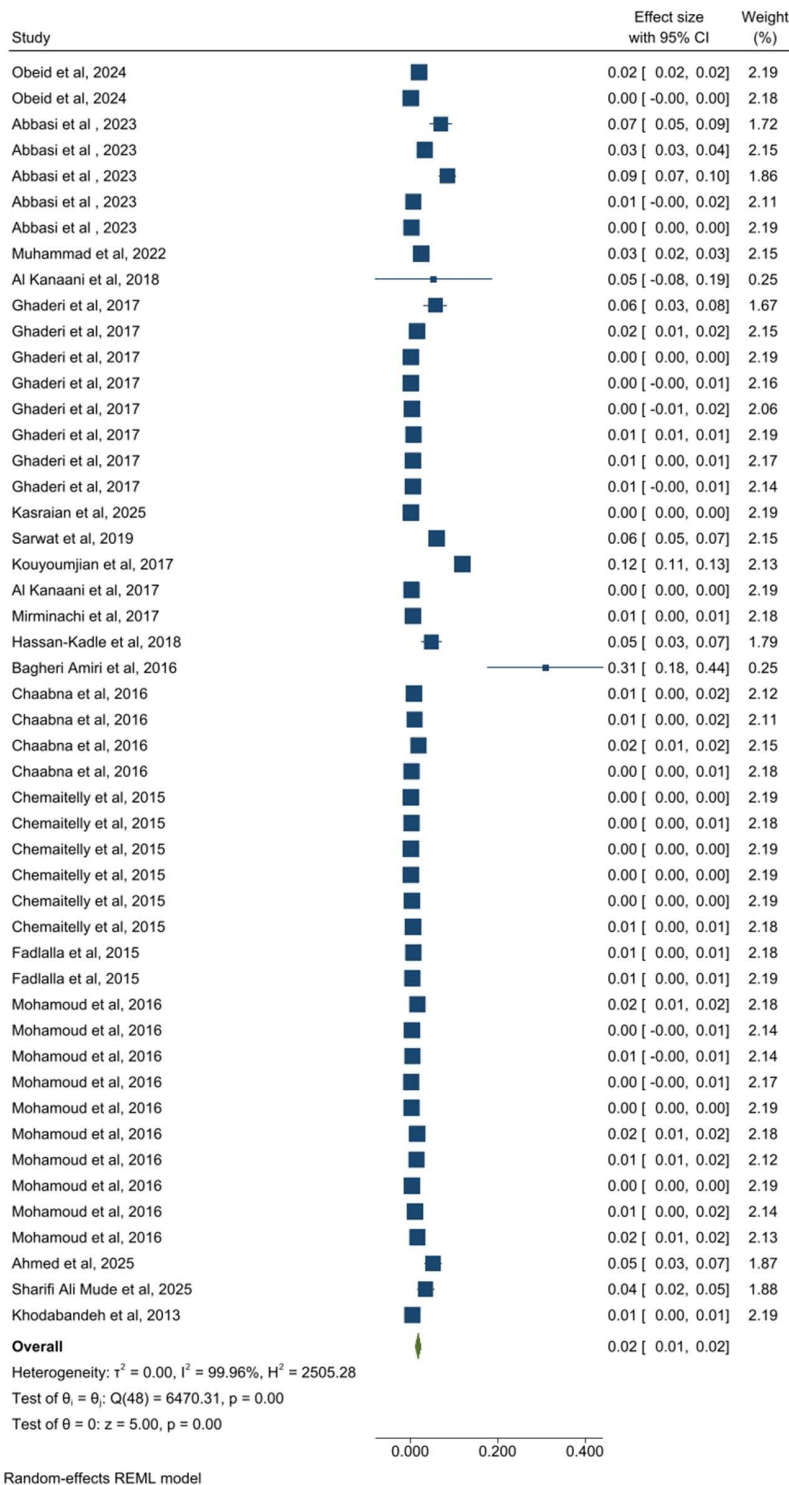

Fig 3. Forest plot of prevalence estimates for the apparently healthy individuals' group.

<https://doi.org/10.1371/journal.pone.0346782.g003>

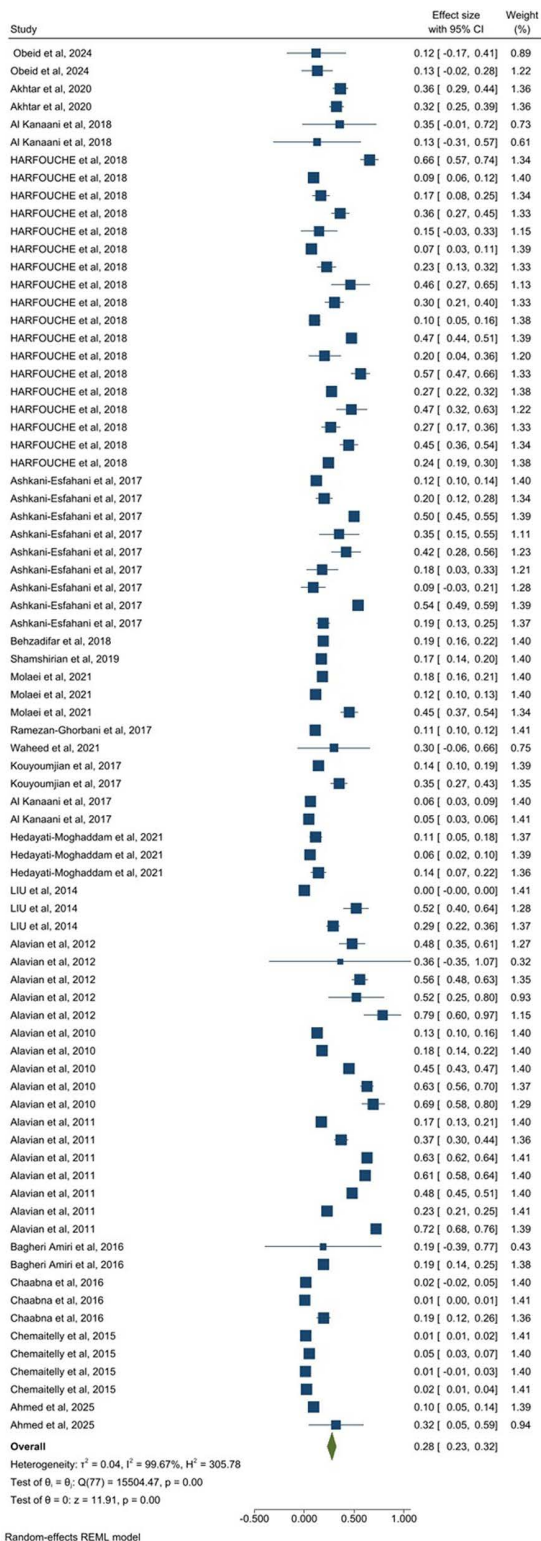

Fig 4. Forest plot of prevalence estimates for people with clinical or healthcare-associated exposure risk.

<https://doi.org/10.1371/journal.pone.0346782.g004>

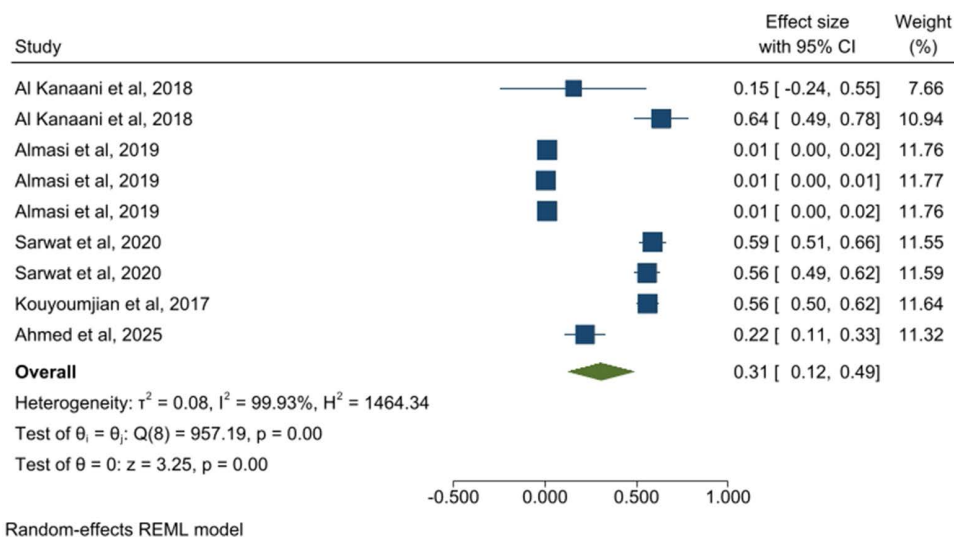

**Fig 5. Forest plot of prevalence estimates for the co-infected patients' group.**

<https://doi.org/10.1371/journal.pone.0346782.g005>

The high prevalence of HCV in our study was observed among key populations. These groups are at elevated risk due to behavioral and social factors such as unsafe injection practices, sharing of contaminated equipment, co-infection with HIV, high-risk sexual behaviors, and inadequate infection control within prisons. Although there are few studies on the prevalence of HCV in Libya, in line with this study, a meta-analysis showed that the prevalence of HCV among PWID in this country is high, and HCV was most prevalent among PWID. Importantly, bordering areas with a high prevalence of the disease, such as Egypt, increase the country's vulnerability, and political challenges and ongoing healthcare issues could increase the risk of transmission [90]. Furthermore, limited access to preventive and harm-reduction services increases the transmission risk in these populations, highlighting the need for targeted public health interventions within the region [24,91].

Despite the availability of effective DAAs, PWID often face barriers, including stigma, discrimination, and inconsistent health services [92]. Implementing comprehensive harm-reduction programs such as needle and syringe programs and opioid substitution therapy (OST) can reduce transmission and improve treatment outcomes. Also, adapted interventions to the social and cultural context of each country will be necessary to reach this key population effectively. For instance, harm-reduction programs, access to DAAs for everyone, and integrating HIV/hepatitis services are also effective steps to reduce the burden of disease in this region, especially in the high-risk population [93].

From an epidemiological perspective, healthcare-related exposures play a major role in HCV transmission. In addition to blood transfusions, a range of unsafe medical practices, such as hemodialysis, surgical procedures, organ transplantation, and injections administered in both clinical and household settings, have contributed to the spread and overall burden of HCV infection. Both patients and healthcare workers are at risk; patients may be exposed through contact with contaminated medical equipment, while healthcare workers face occupational hazards, particularly accidental blood exposure. Although transmission from infected healthcare workers to patients is rare, such events are documented [94].

As highlighted in previous studies, countries with a very high population-level prevalence, such as Egypt, have been strongly affected by care-associated transmission, whereas countries with a lower rate in EMR or other regions showed minimal healthcare-related risk [95,96]. It should be noted that studies in Egypt have revealed a significant decrease in HCV prevalence over time in the general population, reflecting improved infection control practices, blood screening, and the implementation of national treatment campaigns [97,98].

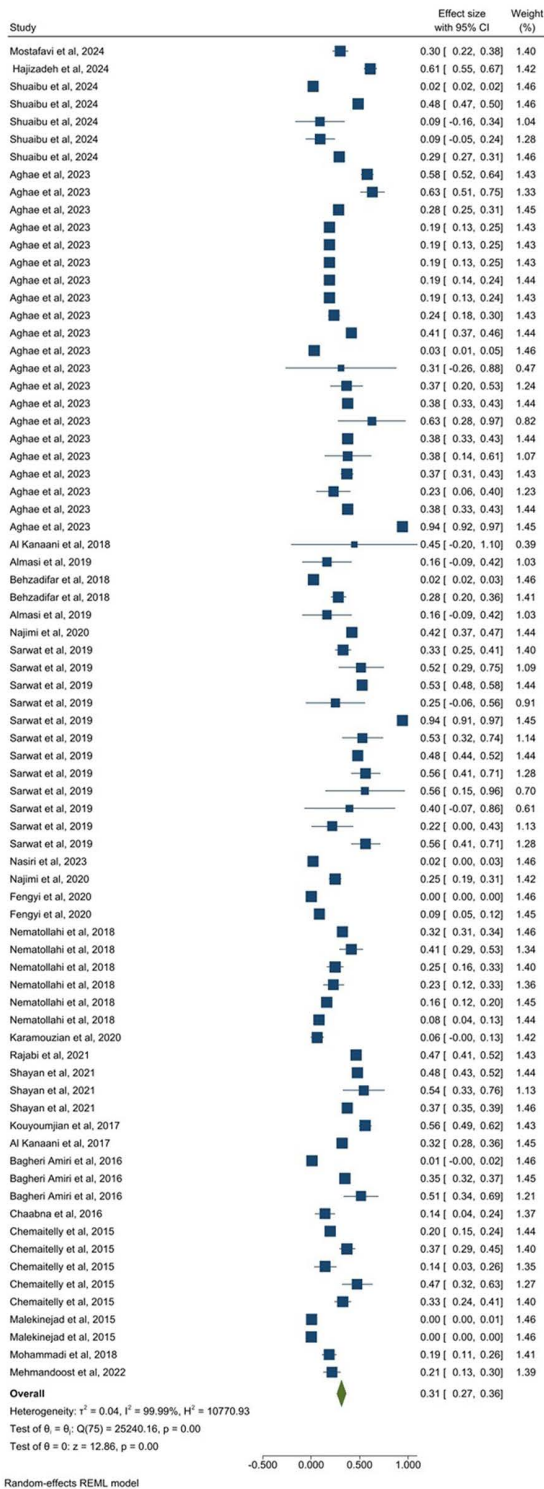

Fig 6. Forest plot of the prevalence estimates for key population groups.

<https://doi.org/10.1371/journal.pone.0346782.g006>

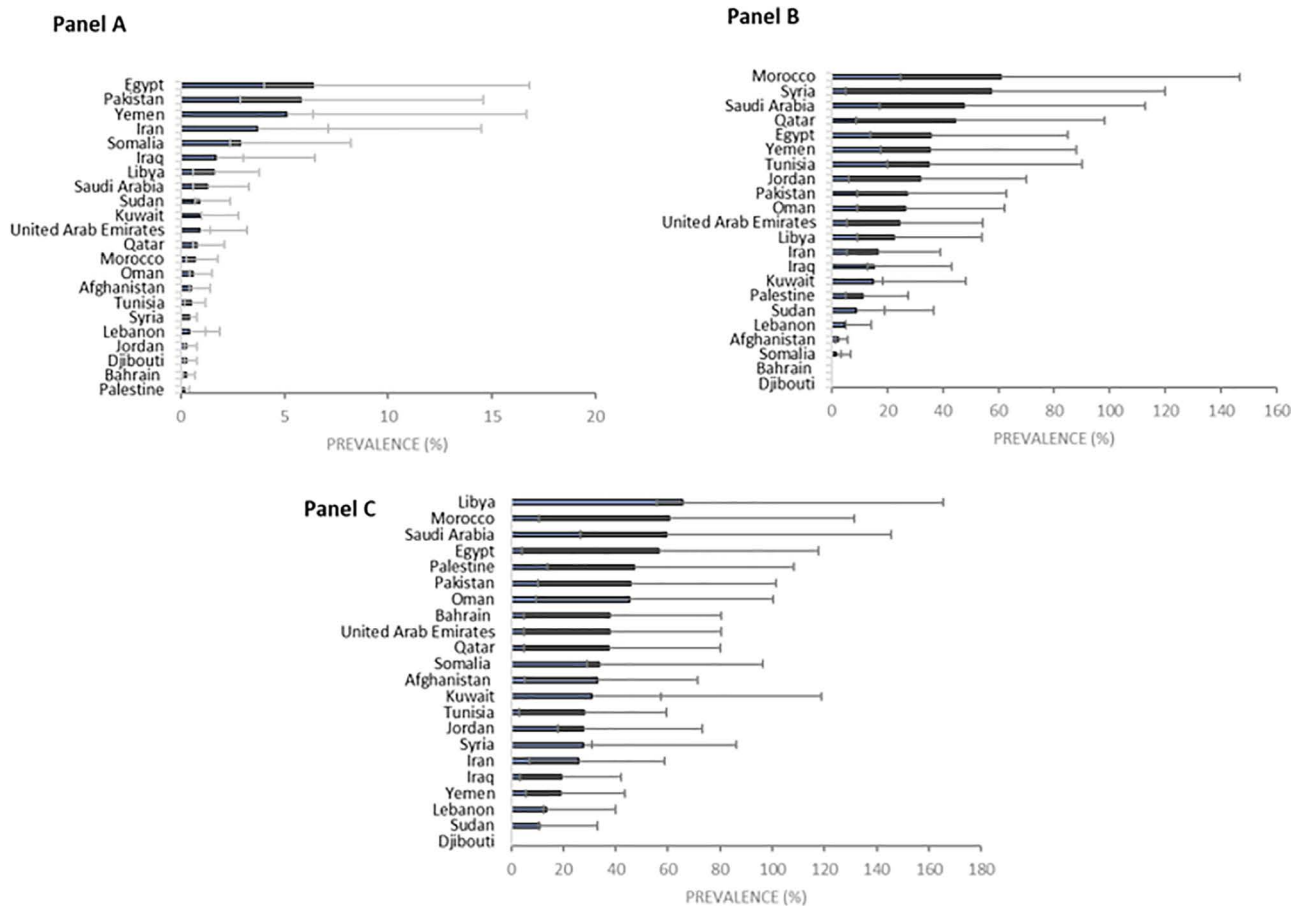

**Fig 7. Rank of EMR countries in HCV prevalence in apparently healthy individuals (Panel A), people with clinical or healthcare-associated exposure risk (Panel B), and the key population (Panel C).**

<https://doi.org/10.1371/journal.pone.0346782.g007>

On the other hand, Pakistan faces a major public health challenge due to the widespread use of unnecessary injections, which has contributed to the high prevalence of HCV. As a result, populations that are generally considered apparently healthy, such as blood donors, have shown significant infection rates. In our study, published based on a meta-analysis, Pakistan ranked second in the region in terms of HCV prevalence among apparently healthy individuals, highlighting the impact of healthcare-associated exposures even in low-risk groups. Notably, a study in Morocco found that blood transfusions, dental care, and surgical history were strongly associated with HCV infection [99]. These evidences suggest that in settings with prevalent exposure to pathogens, community-level transmission can be significant even in groups without traditional behavioral risk factors, and emphasizes the need for infection control measures and targeted public health interventions in both clinical and general populations.

Our subgroup time period analysis showed that in 2015 and after, which coincided with a time when the number of people treated with DAAs increased significantly, and various countries began to plan and expand treatment, the HCV prevalence decreased in the clinical and health care population group. In line with our findings, several countries in the EMR have made significant progress in controlling HCV, with Egypt being the most prominent example. Large-scale national screening programs, widespread access to DAA, improved injection safety, and strengthened blood screening have significantly reduced the incidence, placing Egypt as a global leader in HCV elimination efforts [100]. However, despite these

gains, our findings still show that Egypt has the highest HCV prevalence in the region. The historical burden of infection explains this apparent contradiction. For decades, Egypt has experienced exceptionally high transmission rates, resulting in a large number of people who were infected long before recent interventions were implemented. Thus, although current transmission has declined sharply, the accumulated reservoir of chronic infections continues to maintain high national prevalence estimates. This highlights an important distinction between successfully reducing incidence and achieving a slower, long-term reduction in overall population-level prevalence [101,102].

Systemic weaknesses in EMR health systems, as noted in the WHO Vision 2023 report [103], explain the high HCV prevalence in populations. EMR countries face ongoing humanitarian crises, armed conflicts, and limited healthcare resources, all of which hinder the consistent implementation of infection-control practices. Overcrowded facilities, insufficiently trained personnel, and fragmented surveillance further increase the risk of nosocomial transmission. While some countries in the region have achieved notable public health successes, these gains remain variable, and many populations continue to be exposed to unsafe medical practices. The compounded effects of conflict and natural disasters have strained health services, emphasizing the critical need for strengthened infection control, capacity building, and effective oversight systems to reduce iatrogenic HCV transmission in the region [103]. Although DAAs have greatly improved outcomes, the region still faces barriers to care. Limited access to DAAs, weak health system infrastructures, and high prevalence of high-risk groups such as PWID contribute to a considerable burden of HCV, which should be considered [104,105].

### Limitation

This umbrella review has several limitations. Although our findings indicate variation in HCV prevalence across EMRO countries, it is important to consider that the number and quality of available studies differ substantially between countries. Nations such as Egypt, Iran, and Pakistan have conducted numerous epidemiological investigations with large sample sizes, while others, including Somalia and Djibouti, have limited data due to political instability, inadequate surveillance systems, and restricted research capacity [106]. As a result, it may partially contribute to observed differences in infection burden between regions. Additionally, overall low-to-moderate CCA values suggest limited overlap among included reviews; some primary studies, especially in co-infected populations, appeared in multiple reviews, warranting cautious interpretation. Finally, meta-regression indicated no significant country-level effect; however, these results should be interpreted cautiously due to possible limited power to detect small differences between countries. Despite these issues, this umbrella review suggested a comprehensive overview of HCV distribution across EMR population groups.

### Conclusion

Despite the high burden of HCV in the EMR, data on prevalence across population groups remain sparse. This comprehensive review provides a synthesis of the available evidence and provides important insights into population-specific risks and patterns of virus circulation, which are essential for targeted public health interventions and policy-making in the region. While overall prevalence remains low among apparently healthy individuals, higher rates have been observed among key populations, such as PWID, people in prison, and FSW, as well as among individuals exposed to clinical or healthcare-associated factors. These disparities highlighted the influence of risk factors on HCV transmission dynamics in the region. Key steps seem to be increasing access to DAAs, improving infection-control practices in healthcare settings, and providing harm-reduction programs for PWID. Combining HCV screening and treatment with HIV and other services, along with strong surveillance systems, will help identify and manage co-infections more effectively. Policymakers would be better to focus resources on high-risk populations and work together regionally to share best practices and support countries facing health system challenges. These measures are necessary for making real progress toward the WHO's hepatitis elimination goals and highlight the need for targeted prevention strategies in different populations.

## Supporting information

**S1 Table. Condition/Context/Population criteria for inclusion of studies.**

(DOCX)

**S2 Table. Database search strategy using PubMed, Scopus, and Web of Science.**

(DOCX)

**S3 Table. Summary of reviews included in the Umbrella Review of HCV prevalence across diverse populations in EMR.**

(DOCX)

**S1 Fig. Forest plot of prevalence estimates for the apparently healthy individuals' group before 2015.**

(TIF)

**S2 Fig. Forest plot of prevalence estimates for the apparently healthy individuals' group in 2015 and after.**

(TIF)

**S3 Fig. Forest plot of prevalence estimates for people with clinical or healthcare-associated exposure risk before 2015.**

(TIF)

**S4 Fig. Forest plot of prevalence estimates for people with clinical or healthcare-associated exposure risk in 2015 and after.**

(TIF)

**S5 Fig. Forest plot of the prevalence estimates for key population groups before 2015.**

(TIF)

**S6 Fig. Forest plot of the prevalence estimates for key population groups in 2015 and after.**

(TIF)

## Acknowledgments

**AI declaration:** An AI-based tool was used to improve grammar and language clarity; **no** content generation or data analysis was performed using artificial intelligence.

## Author contributions

**Conceptualization:** Hamid Sharifi, Zahra Abdolahinia, Sana Eybpoosh, Ali Karamoozian, Kayhan Azadmanesh.

**Data curation:** Zahra Abdolahinia, Parya Jangipour Afshar.

**Formal analysis:** Zahra Abdolahinia.

**Investigation:** Hamid Sharifi, Zahra Abdolahinia, Sana Eybpoosh, Ali Karamoozian, Kayhan Azadmanesh.

**Methodology:** Hamid Sharifi, Zahra Abdolahinia, Sana Eybpoosh, Ali Karamoozian, Kayhan Azadmanesh.

**Project administration:** Hamid Sharifi, Sana Eybpoosh.

**Software:** Zahra Abdolahinia.

**Supervision:** Hamid Sharifi.

**Validation:** Hamid Sharifi, Sana Eybpoosh, Kayhan Azadmanesh.

**Visualization:** Zahra Abdolahinia.

**Writing – original draft:** Zahra Abdolahinia.

**Writing – review & editing:** Hamid Sharifi, Zahra Abdolahinia, Sana Eyboosh, Parya Jangipour Afshar, Ali Karamoozian, Kayhan Azadmanesh.

## References

1. Stasi C, Milli C, Voller F, Silvestri C. The epidemiology of chronic hepatitis C: Where we are now. *Livers*. 2024;4(2):172–81. <https://doi.org/10.3390/livers4020013>
2. Hepatitis C—Key Facts [Internet]. Available from: <https://www.who.int/news-room/fact-sheets/detail/hepatitis-c>
3. Messina JP, Humphreys I, Flaxman A, Brown A, Cooke GS, Pybus OG, et al. Global distribution and prevalence of hepatitis C virus genotypes. *Hepatology*. 2015;61(1):77–87. <https://doi.org/10.1002/hep.27259> PMID: 25069599
4. Polaris Observatory HCV Collaborators. Global prevalence and genotype distribution of hepatitis C virus infection in 2015: a modelling study. *Lancet Gastroenterol Hepatol*. 2017;2(3):161–76. [https://doi.org/10.1016/S2468-1253\(16\)30181-9](https://doi.org/10.1016/S2468-1253(16)30181-9) PMID: 28404132
5. Mahmud S, Al-Kanaani Z, Chemaitelly H, Chaabna K, Kouyoumjian SP, Abu-Raddad LJ. Hepatitis C virus genotypes in the Middle East and North Africa: distribution, diversity, and patterns. *J Med Virol*. 2018;90(1):131–41. <https://doi.org/10.1002/jmv.24921> PMID: 28842995
6. Mohamoud YA, Riome S, Abu-Raddad LJ. Epidemiology of hepatitis C virus in the Arabian Gulf countries: systematic review and meta-analysis of prevalence. *Int J Infect Dis*. 2016;46:116–25. <https://doi.org/10.1016/j.ijid.2016.03.012> PMID: 26996460
7. Frank C, Mohamed MK, Strickland GT, Lavanchy D, Arthur RR, Magder LS, et al. The role of parenteral antischistosomal therapy in the spread of hepatitis C virus in Egypt. *Lancet*. 2000;355(9207):887–91. [https://doi.org/10.1016/S0140-6736\(99\)06527-7](https://doi.org/10.1016/S0140-6736(99)06527-7) PMID: 10752705
8. Polaris Observatory HCV Collaborators. Global change in hepatitis C virus prevalence and cascade of care between 2015 and 2020: a modelling study. *Lancet Gastroenterol Hepatol*. 2022;7(5):396–415. [https://doi.org/10.1016/S2468-1253\(21\)00472-6](https://doi.org/10.1016/S2468-1253(21)00472-6) PMID: 35180382
9. Wirtz AL, Yeh PT, Flath NL, Beyrer C, Dolan K. HIV and viral hepatitis among imprisoned key populations. *Epidemiol Rev*. 2018;40(1):12–26. <https://doi.org/10.1093/epirev/mxy003> PMID: 29688317
10. Jadoul M, Bieber BA, Martin P, Akiba T, Nwankwo C, Arduino JM, et al. Prevalence, incidence, and risk factors for hepatitis C virus infection in hemodialysis patients. *Kidney Int*. 2019;95(4):939–47. <https://doi.org/10.1016/j.kint.2018.11.038> PMID: 30904068
11. Degenhardt L, Peacock A, Colledge S, Leung J, Grebely J, Vickerman P, et al. Global prevalence of injecting drug use and sociodemographic characteristics and prevalence of HIV, HBV, and HCV in people who inject drugs: a multistage systematic review. *Lancet Glob Health*. 2017;5(12):e1192–207. [https://doi.org/10.1016/S2214-109X\(17\)30375-3](https://doi.org/10.1016/S2214-109X(17)30375-3) PMID: 29074409
12. Alaama AS, Khattabi H, Mugisa B, Atta H, Hermez J, Hutin YJ. Progress towards elimination of viral hepatitis by 2030 in the WHO Eastern Mediterranean Region, 2019. *Lancet Gastroenterol Hepatol*. 2022;7(9):862–70. [https://doi.org/10.1016/S2468-1253\(22\)00082-6](https://doi.org/10.1016/S2468-1253(22)00082-6) PMID: 35817075
13. Fleurence RL, Alter HJ, Collins FS, Ward JW. Global elimination of hepatitis C virus. *Annu Rev Med*. 2025;76(1):29–41. <https://doi.org/10.1146/annurev-med-050223-111239> PMID: 39485830
14. Gough E, Kempf MC, Graham L, Manzanero M, Hook EW, Bartolucci A, et al. HIV and hepatitis B and C incidence rates in US correctional populations and high risk groups: a systematic review and meta-analysis. *BMC Public Health*. 2010;10:777. <https://doi.org/10.1186/1471-2458-10-777> PMID: 21176146
15. Han R, Zhou J, François C, Toumi M. Prevalence of hepatitis C infection among the general population and high-risk groups in the EU/EEA: a systematic review update. *BMC Infect Dis*. 2019;19(1):655. <https://doi.org/10.1186/s12879-019-4284-9> PMID: 31337339
16. Munn Z, Moola S, Lisy K, Riitano D, Tufanaru C. Methodological guidance for systematic reviews of observational epidemiological studies reporting prevalence and cumulative incidence data. *Int J Evid Based Healthc*. 2015;13(3):147–53. <https://doi.org/10.1097/XEB.0000000000000054> PMID: 26317388
17. UNAIDS terminology guidelines [Internet]. 2024. Available from: [https://www.unaids.org/sites/default/files/media\\_asset/2024-terminology-guidelines\\_en.pdf](https://www.unaids.org/sites/default/files/media_asset/2024-terminology-guidelines_en.pdf)
18. Kirvaldize M, Abbadi A, Dahlberg L, Sacco LB, Calderón-Larrañaga A, Morin L. Estimating pairwise overlap in umbrella reviews: considerations for using the corrected covered area (CCA) index methodology. *Res Synth Methods*. 2023;14(5):764–7. <https://doi.org/10.1002/jrsm.1658> PMID: 37501239
19. Shea BJ, Grimshaw JM, Wells GA, Boers M, Andersson N, Hamel C, et al. Development of AMSTAR: a measurement tool to assess the methodological quality of systematic reviews. *BMC Med Res Methodol*. 2007;7:10. <https://doi.org/10.1186/1471-2288-7-10> PMID: 17302989
20. Huedo-Medina TB, Sánchez-Meca J, Marin-Martinez F, Botella J. Assessing heterogeneity in meta-analysis: Q statistic or I<sup>2</sup> index? *Psychol Methods*. 2006;11(2):193.
21. Hunter JP, Saratzis A, Sutton AJ, Boucher RH, Sayers RD, Bown MJ. In meta-analyses of proportion studies, funnel plots were found to be an inaccurate method of assessing publication bias. *J Clin Epidemiol*. 2014;67(8):897–903. <https://doi.org/10.1016/j.jclinepi.2014.03.003> PMID: 24794697
22. Adeiza S, Islam M, Mungadi H, Shuaibu A, Sah R. A preregistered meta-meta-analysis on the global distribution of hepatotropic viruses. *Vopr Virusol*. 2024;69(5):429–40. <https://doi.org/10.36233/0507-4088-234> PMID: 39527765

23. Aghaei AM, Gholami J, Sangchooli A, Rostam-Abadi Y, Olamazadeh S, Ardeshir M. Prevalence of injecting drug use and HIV, hepatitis B, and hepatitis C in people who inject drugs in the Eastern Mediterranean region: a systematic review and meta-analysis. *The Lancet Global Health*. 2023;11(8):e1225–37.
24. Shayan SJ, Nazari R, Kiwanuka F. Prevalence of HIV and HCV among injecting drug users in three selected WHO-EMRO countries: a meta-analysis. *Harm Reduct J*. 2021;18(1):59. <https://doi.org/10.1186/s12954-021-00505-4> PMID: 34044849
25. Mahmud S, Al Kanaani Z, Abu-Raddad LJ. Characterization of the hepatitis C virus epidemic in Pakistan. *BMC Infect Dis*. 2019;19(1):809. <https://doi.org/10.1186/s12879-019-4403-7> PMID: 31521121
26. Chemaitelly H, Chaabna K, Abu-Raddad LJ. The Epidemiology of hepatitis C virus in the fertile crescent: systematic review and meta-analysis. *PLoS One*. 2015;10(8):e0135281. <https://doi.org/10.1371/journal.pone.0135281> PMID: 26296200
27. Mahmud S, Mumtaz GR, Chemaitelly H, Al Kanaani Z, Kouyoumjian SP, Hermez JG, et al. The status of hepatitis C virus infection among people who inject drugs in the Middle East and North Africa. *Addiction*. 2020;115(7):1244–62. <https://doi.org/10.1111/add.14944> PMID: 32009283
28. Kouyoumjian SP, Chemaitelly H, Abu-Raddad LJ. Characterizing hepatitis C virus epidemiology in Egypt: systematic reviews, meta-analyses, and meta-regressions. *Sci Rep*. 2018;8(1):1661. <https://doi.org/10.1038/s41598-017-17936-4> PMID: 29374178
29. Mostafavi E, Ebrahimi B, Doosti-Irani A, Mirzazadeh A. Prevalence of hepatitis B, hepatitis C, and tuberculosis among people living with HIV in Iran: a systematic review and meta-analysis. *BMC Infect Dis*. 2024;24(1):777.
30. Hajzadeh M, Binabaj MM, Asadi A, Abdi M, Shakiba A, Beig M, et al. Prevalence of HCV among patients with HIV in Iran: a systematic review and meta-analysis. *Vacunas (English Edition)*. 2024;25(1):128–39. <https://doi.org/10.1016/j.vacune.2024.02.014>
31. Nasiri N, Kostoulas P, Roshanfekar P, Kheirkhah Vakilabad AA, Khezri M, Mirzaei H, et al. Prevalence of HIV, hepatitis B virus, hepatitis C virus, drug use, and sexual behaviors among street children in Iran: a systematic review and meta-analysis. *Health Sci Rep*. 2023;6(11):e1674. <https://doi.org/10.1002/hsr2.1674> PMID: 37927540
32. Rajabi A, Sharafi H, Alavian SM. Harm reduction program and hepatitis C prevalence in people who inject drugs (PWID) in Iran: an updated systematic review and cumulative meta-analysis. *Harm Reduct J*. 2021;18(1):12. <https://doi.org/10.1186/s12954-020-00441-9> PMID: 33482831
33. Karamouzian M, Nasirian M, Ghaffari Hoseini S, Mirzazadeh A. HIV and other sexually transmitted infections among female sex workers in Iran: a systematic review and meta-analysis. *Arch Sex Behav*. 2020;49(6):1923–37. <https://doi.org/10.1007/s10508-019-01574-0> PMID: 31701288
34. Najimi A, Gholami-Fesharaki M, Rowzati M. Prevalence of hepatitis C virus in Iranian prisoners: an updated systematic review and multilevel meta-analysis study. *Hepat Mon*. 2020;20(5). <https://doi.org/10.5812/hepatmon.102004>
35. Najimi-Varzaneh A, Gholami-Fesharaki M. Prevalence and distribution of Hepatitis C virus in Iranian drug user: systematic review and meta-analysis study. *J Biostat Epidemiol*. 2020;6(1):72–80. <https://doi.org/10.18502/jbe.v6i1.4752>
36. Hashiani AA, Sadeghi F, Ayubi E, Rezaeian S, Moradi Y, Mansori K. Prevalence of HIV, Hepatitis B and C virus co-infections among Iranian high-risk groups: a systematic review and meta-analysis. *Malays J Med Sci*. 2019;26(3):37–48.
37. Mahmud S, Al Kanaani Z, Abu-Raddad LJ. Characterization of the hepatitis C virus epidemic in Pakistan. *BMC Infect Dis*. 2019;19(1):809.
38. Behzadifar M, Gorji HA, Rezapour A, Bragazzi NL. Prevalence of hepatitis C virus infection among prisoners in Iran: a systematic review and meta-analysis. *Harm Reduct J*. 2018;15(1):24. <https://doi.org/10.1186/s12954-018-0231-0> PMID: 29739400
39. Nematollahi S, Ayubi E, Almasi-Hashiani A, Mansori K, Moradi Y, Veisani Y, et al. Prevalence of hepatitis C virus infection among high-risk groups in Iran: a systematic review and meta-analysis. *Public Health*. 2018;161:90–8. <https://doi.org/10.1016/j.puhe.2018.04.011> PMID: 29935474
40. Bagheri Amiri F, Mostafavi E, Mirzazadeh A. HIV, HBV and HCV coinfection prevalence in Iran—a systematic review and meta-analysis. *PLoS One*. 2016;11(3):e0151946. <https://doi.org/10.1371/journal.pone.0151946> PMID: 27031352
41. Malekinejad M, Navadeh S, Lotfizadeh A, Rahimi-Movaghar A, Amin-Esmaeili M, Noroozi A. High hepatitis C virus prevalence among drug users in Iran: systematic review and meta-analysis of epidemiological evidence (2001–2012). *Int J Infect Dis*. 2015;40:116–30. <https://doi.org/10.1016/j.ijid.2015.09.022> PMID: 26460088
42. Jin F, Dore GJ, Matthews G, Luhmann N, Macdonald V, Bajis S, et al. Prevalence and incidence of hepatitis C virus infection in men who have sex with men: a systematic review and meta-analysis. *Lancet Gastroenterol Hepatol*. 2021;6(1):39–56. [https://doi.org/10.1016/S2468-1253\(20\)30303-4](https://doi.org/10.1016/S2468-1253(20)30303-4) PMID: 33217341
43. Al Kanaani Z, Mahmud S, Kouyoumjian SP, Abu-Raddad LJ. The epidemiology of hepatitis C virus in Pakistan: systematic review and meta-analyses. *R Soc Open Sci*. 2018;5(4):180257. <https://doi.org/10.1098/rsos.180257> PMID: 29765698
44. Chaabna K, Kouyoumjian SP, Abu-Raddad LJ. Hepatitis C virus epidemiology in Djibouti, Somalia, Sudan, and Yemen: systematic review and meta-analysis. *PLoS One*. 2016;11(2):e0149966. <https://doi.org/10.1371/journal.pone.0149966> PMID: 26900839
45. Behzadifar M, Gorji HA, Rezapour A, Bragazzi NL. Prevalence of hepatitis C virus among street children in Iran. *Infect Dis Poverty*. 2018;7(1):88. <https://doi.org/10.1186/s40249-018-0469-5> PMID: 30269685
46. Malekinejad M, Navadeh S, Lotfizadeh A, Rahimi-Movaghar A, Amin-Esmaeili M, Noroozi A. High hepatitis C virus prevalence among drug users in Iran: systematic review and meta-analysis of epidemiological evidence (2001–2012). *Int J Infect Dis*. 2015;40:116–30. <https://doi.org/10.1016/j.ijid.2015.09.022> PMID: 26460088

47. Mehmandoost S, Khezri M, Mousavian G, Tavakoli F, Mehrabi F, Sharifi H, et al. Prevalence of HIV, hepatitis B virus, and hepatitis C virus among incarcerated people in Iran: a systematic review and meta-analysis. *Public Health*. 2022;203:75–82. <https://doi.org/10.1016/j.puhe.2021.11.020> PMID: [35032918](https://pubmed.ncbi.nlm.nih.gov/35032918/)
48. Mohammadi M, Mirzaei M, Mahmoudi K H A KHA, Zahedneghad H, Vaisi R A A RAA, Jalali A. Prevalence of hepatitis C in Iranian prisoners (2001–2016): a systematic review and meta-analysis. *Zanco J Med Sci*. 2018;22(1):1–13.
49. Azzam A, Khaled H, Hussein SM, Gendy KR, Hassan FE. Prevalence and clinical implications of occult hepatitis C infection: a meta-analysis of studies conducted in Egypt. *Egypt J Intern Med*. 2025;37(1). <https://doi.org/10.1186/s43162-025-00432-x>
50. Mahmud S, Chemaitelly H, Al Kanaani Z, Kouyoumjian SP, Abu-Raddad LJ. Hepatitis C virus infection in populations with liver-related diseases in the Middle East and North Africa. *Hepatol Commun*. 2020;4(4):577–87. <https://doi.org/10.1002/hep4.1491> PMID: [32258952](https://pubmed.ncbi.nlm.nih.gov/32258952/)
51. Kouyoumjian SP, Chemaitelly H, Abu-Raddad LJ. Characterizing hepatitis C virus epidemiology in Egypt: systematic reviews, meta-analyses, and meta-regressions. *Sci Rep*. 2018;8(1):1661. <https://doi.org/10.1038/s41598-017-17936-4> PMID: [29374178](https://pubmed.ncbi.nlm.nih.gov/29374178/)
52. Hashiani AA, Sadeghi F, Ayubi E, Rezaeian S, Moradi Y, Mansori K, et al. Prevalence of HIV, Hepatitis B and C virus co-infections among Iranian high-risk groups: a systematic review and meta-analysis. *Malays J Med Sci*. 2019;26(3):37–48. <https://doi.org/10.21315/mjms2019.26.3.3> PMID: [31303849](https://pubmed.ncbi.nlm.nih.gov/31303849/)
53. Hedayati-Moghaddam MR, Soltanian H, Ahmadi-Ghezeldasht S. Occult hepatitis C virus infection in the Middle East and Eastern Mediterranean countries: a systematic review and meta-analysis. *World J Hepatol*. 2021;13(2):242–60. <https://doi.org/10.4254/wjh.v13.i2.242> PMID: [33708353](https://pubmed.ncbi.nlm.nih.gov/33708353/)
54. Harfouche M, Chemaitelly H, Mahmud S, Chaabna K, Kouyoumjian SP, Al Kanaani Z, et al. Epidemiology of hepatitis C virus among hemodialysis patients in the Middle East and North Africa: systematic syntheses, meta-analyses, and meta-regressions. *Epidemiol Infect*. 2017;145(15):3243–63. <https://doi.org/10.1017/S0950268817002242> PMID: [28988562](https://pubmed.ncbi.nlm.nih.gov/28988562/)
55. Ashkani-Esfahani S, Alavian SM, Salehi-Marzijarani M. Prevalence of hepatitis C virus infection among hemodialysis patients in the Middle-East: a systematic review and meta-analysis. *World J Gastroenterol*. 2017;23(1):151–66. <https://doi.org/10.3748/wjg.v23.i1.151> PMID: [28104991](https://pubmed.ncbi.nlm.nih.gov/28104991/)
56. Alavian S-M, Tabatabaei S-V, Mahboobi N. Epidemiology and risk factors of HCV infection among hemodialysis patients in countries of the Eastern Mediterranean Regional Office of WHO (EMRO): a quantitative review of literature. *J Public Health*. 2010;19(2):191–203. <https://doi.org/10.1007/s10389-010-0366-2>
57. Alavian S-M, Kabir A, Ahmadi AB, Lankarani KB, Shahbabaie MA, Ahmadzad-Asl M. Hepatitis C infection in hemodialysis patients in Iran: a systematic review. *Hemodial Int*. 2010;14(3):253–62. <https://doi.org/10.1111/j.1542-4758.2010.00437.x> PMID: [20491973](https://pubmed.ncbi.nlm.nih.gov/20491973/)
58. Obeid D, Alsuwairi F, Alnemari R, Al-Qahtani A, Kurdi W, Alfareh M, et al. Sexually transmitted infections in the middle east and North Africa: comprehensive systematic review and meta-analysis. *BMC Infect Dis*. 2024;24(1):1229. <https://doi.org/10.1186/s12879-024-10153-1> PMID: [39487391](https://pubmed.ncbi.nlm.nih.gov/39487391/)
59. Hedayati-Moghaddam MR, Soltanian H, Ahmadi-Ghezeldasht S. Occult hepatitis C virus infection in the Middle East and Eastern Mediterranean countries: a systematic review and meta-analysis. *World J Hepatol*. 2021;13(2):242–60. <https://doi.org/10.4254/wjh.v13.i2.242> PMID: [33708353](https://pubmed.ncbi.nlm.nih.gov/33708353/)
60. Molaei A, Gholami Fesharaki M. Epidemiology of Hepatitis C virus in Iranian thalassemic, hemodialysis and hemophilic patients: a meta-analysis study. *J Biostat Epidemiol*. 2021;7(1):185–197. <https://doi.org/10.18502/jbe.v7i1.6298>
61. Shamshirian A, Alizadeh-Navaei R, Pourfathollah AA, Alipoor R, Mohseni AR. Seroprevalence and geographical distribution of hepatitis C virus in Iranian patients with thalassemia: a systematic review and meta-analysis. *J Lab Med*. 2019;43(2):45–55. <https://doi.org/10.1515/labmed-2018-0150>
62. Behzadifar M, Gorji HA, Bragazzi NL. The prevalence of hepatitis C virus infection in thalassemia patients in Iran from 2000 to 2017: a systematic review and meta-analysis. *Arch Virol*. 2018;163(5):1131–40. <https://doi.org/10.1007/s00705-018-3767-0> PMID: [29411135](https://pubmed.ncbi.nlm.nih.gov/29411135/)
63. Ramezan Ghorbani N, Qorbani M, Djalalinia S, Kazemzadeh Atoofi M, Tajbakhsh R, Mansourian M, et al. Oncogenic viral infections among Iranian hemodialysis patients: a systematic review. *Int J Prev Med*. 2019;10:216. [https://doi.org/10.4103/ijpvm.IJPVM\\_458\\_17](https://doi.org/10.4103/ijpvm.IJPVM_458_17) PMID: [31929863](https://pubmed.ncbi.nlm.nih.gov/31929863/)
64. Bagheri Amiri F, Mostafavi E, Mirzazadeh A. HIV, HBV and HCV coinfection prevalence in Iran—a systematic review and meta-analysis. *PLoS One*. 2016;11(3):e0151946. <https://doi.org/10.1371/journal.pone.0151946> PMID: [27031352](https://pubmed.ncbi.nlm.nih.gov/27031352/)
65. Liu Y-B, Xie J-Z, Zhong C-J, Liu K. Hepatitis C virus infection among hemodialysis patients in Asia: a meta-analysis. *Eur Rev Med Pharmacol Sci*. 2014;18(21):3174–82. PMID: [25487925](https://pubmed.ncbi.nlm.nih.gov/25487925/)
66. Alavian SM, Aalaei-Andabili SH. Lack of knowledge about Hepatitis C infection rates among patients with inherited coagulation disorders in countries under the Eastern Mediterranean Region Office of WHO (EMRO): a meta-analysis. *Hepat Mon*. 2012;12(4):244–52. <https://doi.org/10.5812/hepatmon.844> PMID: [22690231](https://pubmed.ncbi.nlm.nih.gov/22690231/)
67. Waheed U, Saba N, Wazeer A, Ahmed S. A systematic review and meta-analysis on the epidemiology of hepatitis B and hepatitis C virus among beta-thalassemia major patients in Pakistan. *J Lab Phys*. 2021;13(3):270–6. <https://doi.org/10.1055/s-0041-1731110> PMID: [34602793](https://pubmed.ncbi.nlm.nih.gov/34602793/)
68. Arshad A, Ashfaq UA. Epidemiology of hepatitis C infection in Pakistan: current estimate and major risk factors. *Crit Rev Eukaryot Gene Expr*. 2017;27(1):63–77. <https://doi.org/10.1615/CritRevEukaryotGeneExpr.2017018953> PMID: [28436333](https://pubmed.ncbi.nlm.nih.gov/28436333/)
69. Alavian S, Tabatabaei S, Bagheri LK. Epidemiology of HCV infection among thalassemia patients in eastern Mediterranean countries: a quantitative review of literature. 2010;12(4):365–76.
70. Alavian S-M, Kabir A, Ahmadi AB, Lankarani KB, Shahbabaie MA, Ahmadzad-Asl M. Hepatitis C infection in hemodialysis patients in Iran: a systematic review. *Hemodial Int*. 2010;14(3):253–62. <https://doi.org/10.1111/j.1542-4758.2010.00437.x> PMID: [20491973](https://pubmed.ncbi.nlm.nih.gov/20491973/)

71. Ashkani-Esfahani S, Alavian SM, Salehi-Marzijarani M. Prevalence of hepatitis C virus infection among hemodialysis patients in the Middle-East: a systematic review and meta-analysis. *World J Gastroenterol*. 2017;23(1):151–66. <https://doi.org/10.3748/wjg.v23.i1.151> PMID: 28104991
72. Akhtar S, Nasir JA, Hinde A. The prevalence of hepatitis C virus infection in  $\beta$ -thalassemia patients in Pakistan: a systematic review and meta-analysis. *BMC Public Health*. 2020;20(1):587. <https://doi.org/10.1186/s12889-020-8414-5> PMID: 32349737
73. Akhtar S, Nasir JA, Usman M, Sarwar A, Majeed R, Billah B. The prevalence of hepatitis C virus in hemodialysis patients in Pakistan: a systematic review and meta-analysis. *PLoS One*. 2020;15(5):e0232931. <https://doi.org/10.1371/journal.pone.0232931> PMID: 32407423
74. Abbasi F, Almukhtar M, Fazlollahpour-Naghibi A, Alizadeh F, Behzad Moghadam K, Jafari Tadi M, et al. Hepatitis C infection seroprevalence in pregnant women worldwide: a systematic review and meta-analysis. *EClinicalMedicine*. 2023;66:102327. <https://doi.org/10.1016/j.eclinm.2023.102327> PMID: 38045801
75. Mohamoud YA, Riome S, Abu-Raddad LJ. Epidemiology of hepatitis C virus in the Arabian Gulf countries: systematic review and meta-analysis of prevalence. *Int J Infect Dis*. 2016;46:116–25. <https://doi.org/10.1016/j.ijid.2016.03.012> PMID: 26996460
76. Abdel-Gawad M, Abd-Elsalam S, Abdel-Gawad I, Tag-Adeen M, El-Sayed M, Abdel-Malek D. Seroprevalence of hepatitis C virus infection in children: a systematic review and meta-analysis. *Liver Int*. 2022;42(6):1241–9. <https://doi.org/10.1111/liv.15212> PMID: 35220648
77. Ghaderi-Zefrehi H, Sharafi H, Sadeghi F, Gholami-Fesharaki M, Farasat A, Jahanpeyma F, et al. Seroprevalence of Hepatitis C Virus among blood donors in Middle Eastern Countries: a systematic review and meta-analysis. *Iran Red Crescent Med J*. 2017;19(12). <https://doi.org/10.5812/ircmj.58045>
78. Obeid D, Alsuwairi F, Alnemari R, Al-Qahtani A, Kurdi W, Alfareh M, et al. Sexually transmitted infections in the middle east and North Africa: comprehensive systematic review and meta-analysis. *BMC Infect Dis*. 2024;24(1):1229. <https://doi.org/10.1186/s12879-024-10153-1> PMID: 39487391
79. Kasraian L, Imanieh MH, Tabrizi R, Shahriarirad R, Erfani A, Hosseini S. Prevalence of HBV and HCV infections in Iranian blood donors; an updated systematic review and meta-analysis. *Middle East J Dig Dis*. 2021;13(3):237–52. <https://doi.org/10.34172/mejdd.2021.231> PMID: 36606217
80. Mirminachi B, Mohammadi Z, Merat S, Neishabouri A, Sharifi AH, Alavian SH, et al. Update on the prevalence of hepatitis C virus infection among Iranian general population: a systematic review and meta-analysis. *Hepat Mon*. 2017;17(2). <https://doi.org/10.5812/hepatmon.42291>
81. Khodabandehloo M, Roshani D, Sayehmiri K. Prevalence and trend of hepatitis C virus infection among blood donors in Iran: a systematic review and meta-analysis. *J Res Med Sci*. 2013;18(8):674–82. PMID: 24379843
82. Waheed U, Saba N, Wazeer A, Ahmed S. A systematic review and meta-analysis on the epidemiology of hepatitis B and hepatitis C virus among beta-thalassemia major patients in Pakistan. *J Lab Physicians*. 2021;13(3):270–6. <https://doi.org/10.1055/s-0041-1731110> PMID: 34602793
83. Fadlalla FA, Mohamoud YA, Mumtaz GR, Abu-Raddad LJ. The epidemiology of hepatitis C virus in the Maghreb region: systematic review and meta-analyses. *PLoS One*. 2015;10(3):e0121873. <https://doi.org/10.1371/journal.pone.0121873> PMID: 25803848
84. Ali Mude AS, Nageye YA, Bello KE. Prevalence of hepatitis C viral infection in Somalia: a systematic review and meta-analysis. *Microb Infect Dis*. 2024;0(0):0–0. <https://doi.org/10.21608/mid.2024.309985.2132>
85. Hassan-Kadle MA, Osman MS, Ogurtsov PP. Epidemiology of viral hepatitis in Somalia: Systematic review and meta-analysis study. *World J Gastroenterol*. 2018;24(34):3927–57. <https://doi.org/10.3748/wjg.v24.i34.3927> PMID: 30228786
86. Hepatitis C fact sheet, Sep 2025 [Internet]. 2024. Available from: <https://www.who.int/news-room/fact-sheets/detail/hepatitis-c>
87. team EE. ECDC publishes the annual epidemiological report 2012. *Euro Surveill*. 2013;18(10):20418.
88. Introduction of Hepatitis C Look Back [Internet]. 1994. Available from: [chrome-extension://efaidnbmnnnibpcajpcglclefindmkaj/https://www.infected-bloodinquiry.org.uk/sites/default/files/2023-08-03%20SI/2023-08-03%20SI/DHSC0003533\\_023%20-%20Introduction%20of%20Hepatitis%20C%20Look%20Back%20-%202001%20Dec%201994.pdf?utm\\_source=chatgpt.com](chrome-extension://efaidnbmnnnibpcajpcglclefindmkaj/https://www.infected-bloodinquiry.org.uk/sites/default/files/2023-08-03%20SI/2023-08-03%20SI/DHSC0003533_023%20-%20Introduction%20of%20Hepatitis%20C%20Look%20Back%20-%202001%20Dec%201994.pdf?utm_source=chatgpt.com)
89. Capoferri F, Ciampaglia C, Di Biagi F. *Badlands: il cinema dell'ultima Roma*. Ledizioni; 2022.
90. Ibrahim HK, Al douakali AM, Al Al-awkally AM, Al-awkally NM, Yousuf A. A Hepatitis B virus, hepatitis C virus and human immunodeficiency virus infection in expatriate workers and Libyan people in Darna. *Brilliance: Res Artif Intell*. 2022;2(2):31–7.
91. Karamouzian M, Nasirian M, Ghaffari Hoseini S, Mirzazadeh A. HIV and other sexually transmitted infections among female sex workers in Iran: a systematic review and meta-analysis. *Arch Sex Behav*. 2020;49(6):1923–37. <https://doi.org/10.1007/s10508-019-01574-0> PMID: 31701288
92. Martin NK, Vickerman P, Dore G, Hickman M. The HCV epidemics in key populations (including PWID, prisoners, and MSM): the use of DAAs as treatment for prevention. *Curr Opin HIV AIDS*. 2015;10(5):374.
93. Yela E, Abiétar DG, Clua-García R. How to eliminate hepatitis C between people who inject drugs in community services and prisons in Catalonia. *Harm Reduct J*. 2025;22(1):133. <https://doi.org/10.1186/s12954-025-01286-w> PMID: 40745598
94. Pozzetto B, Memmi M, Garraud O, Roblin X, Berthelot P. Health care-associated hepatitis C virus infection. *World J Gastroenterol*. 2014;20(46):17265–78. <https://doi.org/10.3748/wjg.v20.i46.17265> PMID: 25516637
95. Cornberg M, Razavi HA, Alberti A, Bernasconi E, Buti M, Cooper C, et al. A systematic review of hepatitis C virus epidemiology in Europe, Canada and Israel. *Liver Int*. 2011;31(s2):30–60. <https://doi.org/10.1111/j.1478-3231.2011.02539.x>
96. Sievert W, Altraif I, Razavi HA, Abdo A, Ahmed EA, AlOmair A, et al. A systematic review of hepatitis C virus epidemiology in Asia, Australia and Egypt. *Liver Int*. 2011;31(s2):61–80. <https://doi.org/10.1111/j.1478-3231.2011.02540.x>

97. Waked I, Esmat G, Elsharkawy A, El-Serafy M, Abdel-Razek W, Ghalab R, et al. Screening and treatment program to eliminate hepatitis C in Egypt. *N Engl J Med*. 2020;382(12):1166–74. <https://doi.org/10.1056/NEJMs1912628> PMID: [32187475](https://pubmed.ncbi.nlm.nih.gov/32187475/)
98. Ayoub HH, Abu-Raddad LJ. Impact of treatment on hepatitis C virus transmission and incidence in Egypt: a case for treatment as prevention. *J Viral Hepat*. 2017;24(6):486–95. <https://doi.org/10.1111/jvh.12671> PMID: [28039923](https://pubmed.ncbi.nlm.nih.gov/28039923/)
99. Tagajdid MR, Elkochri S, Elannaz H, Abi R, Amine IL. Epidemiological, clinical and virological characteristics of patients with hepatitis C in Morocco. *Int J Transl Med Res Public Health*. 2020;4(1):30–6. <https://doi.org/10.21106/ijtmrph.126>
100. El Behery M, Elghwab AI, Tabll A, El-Sayed E-SH, Abdelrazek MA. Review Article: Egyptian efforts to control hepatitis C virus in Egypt. *Alfarama J Basic Appl Sci*. 2025;6(2):253–62. <https://doi.org/10.21608/ajbas.2025.362040.1251>
101. Shiha G, Soliman R, Mikhail NNH, Easterbrook P. An educate, test and treat model towards elimination of hepatitis C infection in Egypt: Feasibility and effectiveness in 73 villages. *J Hepatol*. 2020;72(4):658–69. <https://doi.org/10.1016/j.jhep.2019.11.004> PMID: [31734097](https://pubmed.ncbi.nlm.nih.gov/31734097/)
102. Săndulescu O, Dudman SG, Gmizic I, Garcia F, Harvala H, Hasanoglu I. Global hepatitis C elimination: Updates, challenges, and opportunities from real-world experiences in Europe and North America. *Hepatology*. 2025. <https://doi.org/10.1097>
103. Health and healing in the Eastern Mediterranean Region: Progress on Vision 2023 and the priority health targets [Internet]. 2023. Available from: [https://www.emro.who.int/emhj-volume-30-2024/volume-30-issue-7/health-and-healing-in-the-eastern-mediterranean-region-progress-on-vision-2023-and-the-priority-health-targets.html?utm\\_source=chatgpt.com](https://www.emro.who.int/emhj-volume-30-2024/volume-30-issue-7/health-and-healing-in-the-eastern-mediterranean-region-progress-on-vision-2023-and-the-priority-health-targets.html?utm_source=chatgpt.com)
104. Hernando V, Alejos B, Monge S, Berenguer J, Anta L, Vinuesa D, et al. All-cause mortality in the cohorts of the Spanish AIDS Research Network (RIS) compared with the general population: 1997-2010. *BMC Infect Dis*. 2013;13:382. <https://doi.org/10.1186/1471-2334-13-382> PMID: [23961924](https://pubmed.ncbi.nlm.nih.gov/23961924/)
105. Karageorgopoulos DE, Allen J, Bhagani S. Hepatitis C in human immunodeficiency virus co-infected individuals: Is this still a “special population”? *World J Hepatol*. 2015;7(15):1936–52. <https://doi.org/10.4254/wjh.v7.i15.1936> PMID: [26244068](https://pubmed.ncbi.nlm.nih.gov/26244068/)
106. Hassan-Kadle MA. The diagnostic challenges, possible etiologies and lack of researches of hepatocellular carcinoma in Somalia. *OJGas*. 2017;07(03):115–23. <https://doi.org/10.4236/ojgas.2017.73013>
